1 **Running head: Protein turnover assessment in beef cattle**

2

3 **The isotopic N turnover rate as a proxy to evaluate in the long-term the protein turnover**  
4 **in growing ruminants**

5 Gonzalo Cantalapiedra-Hijar\*, H el ene Fouillet<sup>†</sup>, C eline Chantelauze\*, Nadezda Khodorova<sup>†</sup>,  
6 Lahlou Bahloul<sup>#</sup>, Isabelle Ortigues-Marty\*

7

8 \*Universit e Clermont Auvergne, INRA, VetAgro Sup, UMR Herbivores, F-63122 Saint-  
9 Gen es-Champanelle, France

10 <sup>†</sup>UMR Nutrition Physiology and Ingestive Behavior, AgroParisTech, INRA, Paris-Saclay  
11 University, F-75005 Paris, France

12 <sup>#</sup>Adisseo France S.A.S., Antony, France

13

14 Corresponding author: Gonzalo Cantalapiedra-Hijar

15 Email: [gonzalo.cantalapiedra@inra.fr](mailto:gonzalo.cantalapiedra@inra.fr)

16 **ABSTRACT:**

17 Protein turnover is an energy-consuming process essential for ensuring the maintenance of  
18 living organisms. Gold standard methods for protein turnover measurement are based on  
19 intravenous infusions of stable isotopes. Although accurate they have inherent drawbacks  
20 precluding their generalization for large farm animals and during long time periods. We  
21 proposed here a non-invasive proxy of the whole-body fractional protein degradation  
22 (**WBFPDR**; protein turnover for a growing animal) in the long term and in a large number of  
23 beef cattle. The proxy is based on the rate at which urine-N and plasma proteins are  
24 progressively depleted in  $^{15}\text{N}$  after a slight decrease in the isotopic N composition of diet (i.e.  
25 diet-switch). We aimed to test the ability of this proxy to adequately discriminate the WBFPDR  
26 of 36 growing-fattening young bulls assigned to different dietary treatments known to impact  
27 the protein turnover rate: the protein content and amino acid profile. To achieve this objective,  
28 the experimental diets were enriched with  $^{15}\text{N}$  labeled-urea during 35 days while the animals  
29 were adapted to diets. After stopping the  $^{15}\text{N}$  labeled-urea administration the animals were  
30 thereafter sampled for spot urines ( $n = 13$ ) and blood ( $n = 10$ ) over 5 months and analyzed for  
31 their  $^{15}\text{N}$  enrichments in total N and plasma proteins, respectively. Adequately fitting the  $^{15}\text{N}$   
32 kinetics in plasma proteins and urines required mono- and bi-exponential models, respectively,  
33 and the model parameters were compared across dietary conditions using a non-linear mixed  
34 effect model. The single  $^{15}\text{N}$  depletion rate found in plasma proteins represented their fractional  
35 synthesis rate, whereas the slowest depletion rate found in urines was interpreted as a proxy of  
36 the WBFPDR. The proxy here tested in urines suggested different WBFPDR values between  
37 Normal vs High protein diets but not between balanced vs unbalanced methionine diets. In  
38 contrast, the proxy tested in plasma indicated that both dietary conditions affected the fractional  
39 synthesis rate of plasma proteins. We consider that the rate at which urines are progressively

40  $^{15}\text{N}$ -depleted following an isotopic diet-switch could be proposed as a non-invasive proxy of  
41 the long-term whole-body fractional protein degradation rate for large farm animals.

42

43 Keywords: protein turnover, isotope,  $^{15}\text{N}$ , ruminant, beef cattle

44

## 45 INTRODUCTION

46 Protein turnover refers to the renewal of proteins in a cell, tissue or organism and  
47 involves the continuous degradation and synthesis of proteins not leading to net changes in  
48 protein mass. The protein accretion occurring in the growing animal is the result of a greater  
49 intensity of protein synthesis over protein degradation. In the growing state, the protein turnover  
50 rate (amount of replaced proteins per unit of time) equals to total protein degradation or  
51 alternatively to the amount of freshly synthesized protein necessary to replace the degraded  
52 protein. The protein turnover in growing ruminants is huge compared to the net protein  
53 deposition with as high as 94% of the whole body protein synthesis only serving to  
54 counterbalance the protein degradation occurring in fattening young bulls (Lobley, 2003).  
55 Besides, this huge turnover is accompanied by a high-energy cost for the ruminant, with only  
56 protein synthesis accounting for 23% of total energy expenditure in ruminants (Caton et al.,  
57 2000). Nevertheless, this dynamic state represents an essential mechanism for life by enabling  
58 maintenance services such as metabolic regulation, cellular repair and rapid adaptation against  
59 environmental changes, among other functions. This dual facet of protein turnover (“service”  
60 function for maintenance vs energy-consuming mechanism) explain why this animal trait has  
61 been of interest for animal nutritionist and physiologist in the last decades.

62 Standard methods for whole-body protein turnover assessment are based on either  
63 precursor or end-product methods (Waterlow, 1984) consisting in continuous or single dose  
64 intravenous infusions of stable isotope labelled amino acids (**AA**) and the quantification of the

65 labelling in either the free AA precursor pool (plasma) or catabolic end-products (urine),  
66 respectively. The main drawbacks associated to the evaluation of protein turnover rate through  
67 these standard methods are i) short-term evaluation (from few hours [precursor method] to few  
68 days [end-product method]), ii) invasive procedure and usually non-physiological conditions,  
69 iii) the requirement of a controlled environment with confined animals and usually steady-state  
70 conditions [precursor method] iv) expensive methods which precludes applying it to a big  
71 number of large farm animals such as beef cattle. Alternative, less expensive and less invasive  
72 methods have been explored, such as total urinary 3-methyl-histidine excretion, to evaluate the  
73 whole-body protein degradation. However, 3-methyl-histidine urinary excretion is also based  
74 on relatively short term evaluation (i.e. usually between 4 and 6 days), restricted to myofibrillar  
75 muscle protein (myosin-actin) turnover, not applicable for sheep or pigs (cited in Nishizawa et  
76 al., 1979) and subjected to an accurate estimation of the muscle mass in the body (Castro-Bulle  
77 et al., 2007).

78 A new isotopic approach was originally developed in animal ecophysiology (Fry and  
79 Arnold, 1982; Tieszen et al., 1983) to model the rate at which animal's tissues incorporate the  
80 isotopic signature of a new diet in view of accurate food web assessment. It is currently being  
81 applied mainly in marine animal species (Abimorad et al., 2014; Mohan et al., 2016) to evaluate  
82 the metabolic turnover rate of animal's tissues. This isotopic method consists in following the  
83 dynamic of isotopic change (i.e. enrichment or depletion) of animal's tissues immediately after  
84 a change in the natural isotopic composition of the diet (i.e. diet-switch). The rate at which  
85 animal's tissues will incorporate the isotopic signature of the new diet seems to be mostly driven  
86 by their protein turnover rate (Carleton and Martínez del Rio, 2005; MacAvoy et al., 2005;  
87 Braun et al., 2013) and some authors suggest that protein turnover rate might be predicted from  
88 isotopic incorporation studies (Carleton et al., 2008). This approach has already been explored  
89 in ruminant's tissues (Harrison et al., 2011; Bahar et al., 2014) but, as its original purpose, just

90 for assessing the time span needed for muscles to reflect the isotopic signature of the diet in  
91 view of meat authentication (i.e isotopic dietary reconstruction). However, the isotopic  
92 approach used in those studies in ruminant and marine animal species did not involve repeated  
93 measures from the same animal, but only one tissue sample per animal and individuals  
94 slaughtered at different times. Thus, these studies only informed about the turnover of specific  
95 sampled tissues and not of the whole animal body. Because most of the nitrogen from animal  
96 proteins is excreted through urines, once degraded and their AA partially catabolized, our  
97 hypothesis is that the urinary isotopic N turnover rate assessed from multi-point sampling from  
98 the same animal is a non-invasive proxy of the long term whole-body fractional protein  
99 degradation (**WBFPPDR**; protein turnover in a growing animal).

100 Thus, the aim of this study was to adapt the tissue isotopic turnover approach (Braun et  
101 al., 2013; Abimorad et al., 2014) to the ruminant's urine and test it as a non-invasive, less  
102 disturbing proxy of the long term WBFPPDR in a relatively large number of growing-fattening  
103 beef cattle. In addition, we also measured the isotopic turnover of plasma proteins as an  
104 indicator of the fractional protein synthesis rate (**FSR**) of plasma proteins. Because no gold  
105 standard method is currently available for measuring the WBFPPDR in the long term (several  
106 months) we evaluated this proxy by assessing its ability to detect differences across two dietary  
107 factors known to impact the whole-body protein turnover in a different extent: i) the protein  
108 content and intake as a strong and well-known effect (Waterlow, 2006) and ii) the dietary amino  
109 acid profile as a less important modulator of protein turnover rate in cattle (Wessels et al., 1997).  
110 For this purpose, we measured the kinetics of nitrogen isotopic ( $\delta^{15}\text{N}$ ) depletion in urines and  
111 plasma proteins over a 5-month period following a slight decrease in the  $\delta^{15}\text{N}$  of the diet in 36  
112 fattening young bulls fed diets formulated at two different protein and methionine contents.  
113 Preliminary results has been published as an abstract (Cantalapiedra-Hijar et al., 2018).

## 114 **MATERIALS AND METHODS**

115 The experiment was conducted at Herbipôle (Inra, UE 1414, Theix, France) in compliance with  
116 the National Legislation on Animal Care (Certificate of Authorization to Experiment on Living  
117 Animals, APAFIS#7180-2016101016361277 v4, Ministry of Agriculture, France).

118 *Animals, diets and performance test*

119 Thirty-six growing-fattening Charolais bulls (320±33kg and 266±22d) were assigned to one of  
120 the four experimental diets (n=9/treatment) resulting from a factorial 2 × 2 design: two dietary  
121 metabolizable protein levels (100% [Normal] vs 120% [High] of requirements; INRA, 2018)  
122 crossed with two dietary methionine content (unbalanced diet [2.0 g Met/100 g metabolizable  
123 protein] vs balanced diet [2.6 g Met/100 g metabolizable protein]). All diets were iso-NE per  
124 kg DM and consisted of 60% grass silage and 40% concentrate with amounts adjusted daily to  
125 ensure at least 10% of refusals.

126 *Dietary isotopic N switch*

127 The method here applied to assess the WBFPR was based on the rate at which tissues and  
128 animal N pools incorporate a new dietary <sup>15</sup>N isotopic signature following a dietary isotopic  
129 switch (Carleton and Martinez del Rio, 2005; MacAvoy et al., 2005). However, because the  
130 range of natural <sup>15</sup>N abundance values ( $\delta^{15}\text{N}$ ; <sup>15</sup>N/<sup>14</sup>N ratio deviation from the international  
131 standard [atmospheric N<sub>2</sub>]) in ruminant's feed remains quite narrow (between 0 and 5‰ on  
132 average according to our experience; Cantalapiedra-Hijar et al., 2015) we decided to create an  
133 artificial dietary isotopic switch by incorporating in the diet extrinsic <sup>15</sup>N labelled urea as  
134 previously reported (Bahar et al., 2014). The <sup>15</sup>N-urea once degraded into <sup>15</sup>N-ammonia and  
135 taken up by the rumen microorganisms will enrich the animal's tissues through the absorbed  
136 microbial <sup>15</sup>N-AA. Results from a preliminary trial aiming to define the conditions for  
137 implementing this method in ruminants showed that for a given animal the fraction of <sup>15</sup>N-urea  
138 bypassing directly to the urines, without being first incorporated into microbial proteins, was  
139 highly variable across time and individuals and led to problems for fitting the progressive

140 urinary  $^{15}\text{N}$ -enrichment post-diet switch (data not shown). Thus, we decided to evaluate the  
141 animal  $^{15}\text{N}$  turnover rates during a depletion (Abimorad et al., 2014) rather than enrichment  
142 (Bahar et al., 2014) phase. For this, animals were progressively enriched in  $^{15}\text{N}$  over 35 days  
143 while adapting to their respective diet; each animal received daily in the morning (0830) a  
144 capsule (10 x 3mm) containing 20 mg of  $^{15}\text{N}$  labelled urea (98% APE; Sigma–Aldrich, St.  
145 Louis, USA). This amount of  $^{15}\text{N}$  labelled urea and time was chosen for enhancing the urinary  
146  $^{15}\text{N}$  between 10 and 15% above that of the basal diet according to results obtained from a  
147 preliminary trial. The capsule was mixed with around 200 grams of concentrate (the one  
148 assigned to the animal) in a small bucket within the feeder just before the only meal distribution  
149 (0900). Twenty minutes after administration it was systematically checked that the capsule had  
150 been swallowed by the animal. Less than 5% of capsules were administered by hand directly in  
151 the mouth when animals did not swallow it within the first twenty minutes. The rest of the diet  
152 was then distributed to the feeder. On day 36, animals no longer received the  $^{15}\text{N}$  labelled urea,  
153 and blood and urine were sampled from that day (d0) onwards.

#### 154 *Sampling and $^{15}\text{N}$ analysis*

155 Blood was sampled at 0900 by venipuncture from the caudal vein of all animals on d0, d3, d7,  
156 d11, d15, d21, d35, d49, d78 and d141 (n=10 per animal) after stopping the  $^{15}\text{N}$  labelled urea  
157 administration (d0 refers to 24h after the last  $^{15}\text{N}$ -urea administration). Blood was collected into  
158 9 mL evacuated tubes (BD vacutainer, Plymouth, UK) containing lithium heparin as an  
159 anticoagulant, centrifuged within the first hour at 2500 g for 15 min at 4°C and stored at -20°C  
160 for determination of  $\delta^{15}\text{N}$  values in total plasma proteins as previously described  
161 (Cantalapiedra-Hijar et al., 2015). Urinary spot samples were obtained from all animals  
162 between 0900 and 1000 on d0, d1, d2, d3, d4, d7, d9, d11, d14, d17, d35, d70, d142 (n = 13).  
163 For urinary sampling, animals were head blocked during 1h while eating in the morning and a  
164 bucket (30 x 30 x 15 cm) placed around the penis through two elastic ropes knotted on the back

165 of the animal. Most of animals urinated during the first hour and only few samplings were  
166 conducted beyond the first hour and always within the first three hours. Twenty mL of urine  
167 were then transferred into one tube containing 1 mL of 30% H<sub>2</sub>SO<sub>4</sub> and filtered later in the lab  
168 through a 30 µm standard filter paper to remove fine particles. Filtered and acidified spot urine  
169 samples were stored at -20°C before determination of δ<sup>15</sup>N values. Freeze-dried plasma proteins  
170 and liquid urinary samples pipetted onto nitrogen-free absorbent (chromosorb) were weighted  
171 in tin capsules and analyzed for N stable isotope composition (δ<sup>15</sup>N) by using an isotope-ratio  
172 mass spectrometer (Isoprime, VG Instruments, Manchester, UK) coupled to an elemental  
173 analyzer (EA Vario Micro Cube, Elementar, Germany). Tyrosine was used as internal standard  
174 and included in every run to correct for possible variations in the raw values determined by the  
175 mass spectrometer. Results were expressed using the delta notation.

#### 176 *Isotopic turnover rate modelling and statistical analysis*

177 The post-diet switch δ<sup>15</sup>N kinetics measured in each pool (plasma protein and urine) were  
178 carefully analyzed according to Martinez del Rio and Carleton (2012) by testing if they obey to  
179 1st-order or higher-order (2<sup>nd</sup>-order) kinetics according to the following mono- and bi-  
180 exponential models, respectively:

181 Mono-exponential model:  $\delta^{15}\text{N}(t) = \delta^{15}\text{N}_{\infty} + (\delta^{15}\text{N}_0 - \delta^{15}\text{N}_{\infty}) \times \exp^{-k \times t}$  [1]

182 Bi-exponential model:  $\delta^{15}\text{N}(t) = \delta^{15}\text{N}_{\infty} + (\delta^{15}\text{N}_0 - \delta^{15}\text{N}_{\infty}) \times [p \times \exp^{-k_1 \times t} + (1-p) \times \exp^{-k_2 \times t}]$  [2]

183 where t (d) is the time since the <sup>15</sup>N diet-switch, δ<sup>15</sup>N(t) (‰) is the pool δ<sup>15</sup>N value at time t,  
184 δ<sup>15</sup>N<sub>0</sub> (‰) is the pool initial δ<sup>15</sup>N value, and δ<sup>15</sup>N<sub>∞</sub> (‰) is the asymptotic value of the pool after  
185 the animal has reached isotopic steady state with its basal diet (without <sup>15</sup>N-urea  
186 administration). In the mono-exponential model, k (d<sup>-1</sup>) is the fractional isotopic turnover rate  
187 of the pool, while in the bi-exponential model, k<sub>1</sub> and k<sub>2</sub> (d<sup>-1</sup>) are two distinct fractional isotopic  
188 turnover rates and p and (1-p) their respective contributions to the whole isotopic turnover.



189 To diagnose if a mono-exponential model was sufficient to adequately fit the  $\delta^{15}\text{N}$  kinetics, we  
190 used the reaction progress variable approach (Cerling et al., 2007; Martinez del Rio and  
191 Carleton, 2012) that it is based on the rearrangement of equation [1] to yield:

$$192 \ln(1-F) = \ln[(\delta^{15}\text{N}(t) - \delta^{15}\text{N}_\infty) / (\delta^{15}\text{N}_0 - \delta^{15}\text{N}_\infty)] = -k \times t$$

193 where (1-F) measures the remaining  $\delta^{15}\text{N}$  distance to the new equilibrium as a proportion of the  
194 total isotopic distance between the initial and the asymptotic  $\delta^{15}\text{N}$  reached at equilibrium. As  
195 illustrated in Appendix (Figure A1), we decided what model was required on the basis of a  
196 visual inspection of a plot of  $\ln(1-F)$  against time, depending on whether  $\ln(1-F)$  was a  
197 decreasing linear function of time with slope equal to  $-k$  (mono-exponential model) or a  
198 sequence of 2 lines of increasingly shallow slopes equal to  $-k_1$  and  $-k_2$  (bi-exponential model).  
199 This graphical analysis was further supported by the Akaike Information criterion, where lower  
200 values indicates a superiority of one model over another.

201 The model parameters (i.e.,  $\delta^{15}\text{N}_\infty$ ,  $\delta^{15}\text{N}_0$  and  $k$  for the mono-exponential model, and  
202  $\delta^{15}\text{N}_\infty$ ,  $\delta^{15}\text{N}_0$ ,  $k_1$ ,  $k_2$  and  $p$  for the bi-exponential model) were estimated using a non-linear  
203 procedure and statistically analyzed through a non-linear mixed-effect model (nlme package;  
204 Pinheiro and Bates, 2000) fitted by maximum likelihood in the R software (R Development  
205 Core Team, 2015) with experimental dietary factors (protein content, methionine content and  
206 their interaction) considered as fixed effects and the animal as a random effect. To avoid over-  
207 parametrization in the most complex model (bi-exponential) and avoid a failure for the model  
208 to converge, the random effect of animal was only considered on those parameters where  
209 significant animal variability was noted through graphical and statistical analysis (Pinheiro and  
210 Bates, 2000). Significant effects were declared when the  $P \leq 0.05$  and a trend was considered  
211 when  $0.05 > P > 0.10$ .

## 212 **RESULTS**

213 No significant interaction ( $P > 0.05$ ) between protein level and methionine concentration was  
214 observed for any of the variables here analyzed. Thus, for the sake of clarity, results are  
215 presented independently for each of these two experimental factors. During the length of the  
216 applied approach (around 5 months) bulls fed High protein diets had on average higher ( $P =$   
217 0.005) daily gains (1.82 kg/d) compared to those fed Normal protein diets (1.63 kg/d on  
218 average). On the other hand, methionine balanced diets tended ( $P = 0.09$ ) on average to promote  
219 higher daily gains (1.78 kg/d) than bulls fed unbalanced diets (1.67 kg/d).

#### 220 *Urinary isotopic turnover rate*

221 For  $\delta^{15}\text{N}$  kinetics in urines, the reaction progress approach clearly identified two independent  
222 slopes with a cut-off between d4 and d7 (Insets in Figures 1 and 2). This demonstrated the  
223 existence of two distinct rates, a rapid and a slow, of urinary  $\delta^{15}\text{N}$  depletion after the diet-switch,  
224 and justified the need of a bi-exponential model to adequately fit these data. The individual  
225  $\delta^{15}\text{N}$  kinetics were indeed correctly fitted for almost all animals ( $r^2 \geq 0.96$ ;  $n=34$ ) using a bi-  
226 exponential model, except for 2 animals that were badly fitted with no apparent explanation  
227 and that were therefore excluded from the analyses. When all data were pooled and analyzed  
228 through a mixed-effect bi-exponential model, only a significant effect of the dietary protein  
229 content was observed on the fractional rates of  $^{15}\text{N}$ -depletion in urines, where animals fed High  
230 protein diets showed higher values during both the first rapid (89.9 vs. 70.0 %/d;  $P = 0.008$ )  
231 and the second slow (10.3 vs. 8.01%/d;  $P < 0.001$ ) phases of  $\delta^{15}\text{N}$  turnover compared to animals  
232 fed Normal protein diets (Figure 1). No effect of methionine content was observed on any model  
233 parameter ( $P > 0.10$ ; Figure 2).

#### 234 *Plasma isotopic turnover rate*

235 For  $\delta^{15}\text{N}$  kinetics in plasma proteins, the reaction progress approach showed a single slope  
236 (Insets in Figures 3 and 4). This demonstrated the existence of a single, homogenous rate of  
237  $\delta^{15}\text{N}$  depletion in plasma proteins after the diet-switch, and justified that a mono-exponential

238 model was sufficient to adequately fit these data. The individual  $\delta^{15}\text{N}$  kinetics in plasma  
239 proteins were indeed correctly fitted ( $r^2 \geq 0.98$ ;  $n=36$ ) through a mono-exponential asymptotic  
240 model. When all data were pooled and analyzed through a mixed-effect asymptotic model,  
241 lower plasma protein  $\delta^{15}\text{N}$  values were observed in animals fed High compared to Normal  
242 protein diets (Figure 3) on first day (d0;  $P = 0.04$ ) and at equilibrium (d142;  $P = 0.09$ ). In  
243 contrast, the effect of balancing diets in terms of methionine content tended ( $P = 0.09$ ) to have  
244 a higher  $\delta^{15}\text{N}$  value in plasma proteins on d0 (Figure 4) but not at equilibrium ( $P = 0.47$ ). The  
245 fractional  $^{15}\text{N}$ -depletion rate in plasma proteins was higher in animals fed High compared to  
246 Normal protein diets (4.42 vs 4.08%/d;  $P = 0.02$ ) and in those fed diets balanced compared to  
247 unbalanced in methionine (4.38 vs 4.10%/d;  $P = 0.05$ ).

## 248 **DISCUSSION**

249         Following a diet change, animal's tissues progressively assimilate the isotopic signature  
250 of the new diet (Carleton and Martinez del Rio, 2005). The rate at which this occur is known as  
251 the isotopic turnover rate and depends largely on how fast the metabolic tissue replacement  
252 occurs (Tieszen et al., 1983; Arneson et al., 2006). We adapted the tissue isotopic turnover  
253 approach, extensively explored by ecologists (Martinez del Rio and Carleton, 2012), to the case  
254 of ruminant's urines and plasma proteins to respectively evaluate the WBFPPDR (protein  
255 turnover in a growing animal) and plasma protein FSR of 36 growing-fattening cattle in the  
256 long term (5 months). This isotopic approach is simple to set up, relatively cheap (estimated to  
257 be less than 300 dollars per bull), allowing to obtain measurements over long periods (several  
258 months) and without perturbing animals (unlike classic tracer methods with invasive procedures  
259 under non-physiological conditions). Although the mechanistic interpretation of isotopic  
260 turnover rates is always a complex issue (Martinez del Rio and Anderson-Sprecher, 2008), it is  
261 proposed that the rates at which urines and plasma proteins are progressively  $^{15}\text{N}$ -depleted  
262 following an isotopic diet-switch represent non-invasive (or less invasive) proxies of the long-

263 term WBFDR and plasma protein FSR, respectively. Such proxies could be very useful for  
264 future studies on feed efficiency (protein turnover as an energy-consuming process), animal  
265 robustness (protein turnover as a maintenance service) and meat quality (in vivo protein  
266 turnover associated to the rate of post mortem proteolysis and thus to meat tenderness) carried  
267 out on large number of animals.

268

### 269 *Biological meaning of isotopic turnover rates*

270 The simplicity of the method here described may contrast with the need to address some  
271 methodological considerations for interpreting our results. The rate at which animal's tissues  
272 will incorporate the isotopic signature of the new diet seems to be mostly driven by their protein  
273 turnover rate according to many previous reports (Carleton and Martinez del Rio, 2005;  
274 MacAvoy et al., 2005; Braun et al., 2013). Moreover, this has been confirmed by mechanistic  
275 models (Poupin et al., 2013; Martinez del Rio and Carleton, 2012), demonstrating that the main  
276 driver determining the rate of assimilation of the new dietary  $\delta^{15}\text{N}$  value into a tissue after a  
277 diet-switch is the protein FSR of that tissue. Thus, the isotopic turnover rate we found in the  
278 plasma protein pool (i.e., the k model parameter; Figure 3 and 4) represented its own FSR (i.e.,  
279 the sum of its fractional degradation rate and fractional growth rate) and may be proposed as a  
280 way to indirectly evaluate the liver FSR of plasma proteins. In contrast, to the best of our  
281 knowledge the isotopic turnover rate of urine has never been analyzed mechanistically and, as  
282 further discussed, its biological meaning is mainly ascribed to the WBFDR. Some  
283 considerations and assumptions need, however, to be discussed to support our biological  
284 interpretation.

285 First, the urinary  $\delta^{15}\text{N}$  kinetics post diet-switch did not only reflect the N metabolism of  
286 the animal but also that of its symbiotic rumen microbiota. Urines would theoretically also drain  
287 the previously  $^{15}\text{N}$  enriched microbiota as they renovate their own structural proteins and N

288 pools (amino acids but also purine derivatives). However this would have quantitatively a short-  
289 term impact on urinary  $\delta^{15}\text{N}$  kinetics due to the high protein turnover rate of rumen microbiota  
290 (127 to 686%/d in rumen bacteria; Wallace and McPherson, 1987). Second, because of the  
291 complex and extensive urea recycling in ruminants we should not exclude the fact that the  
292 clearance rate of the previously administered  $^{15}\text{N}$  labelled urea from the whole body after  
293 stopping its administration might contribute in an undetermined extent to the urinary  $^{15}\text{N}$   
294 depletion rate during the first hours. In this sense, it has been demonstrated in beef cattle that  
295 most infused  $^{15}\text{N}$ -labelled urea is excreted through urines within the first 48h (Wessels et al.,  
296 1997), and so its impact on urinary  $^{15}\text{N}$  depletion rate would be very short. Third, differences  
297 in the N absorption, and thus in the urinary N excretion, expected across diets (Normal vs High  
298 protein diets) might contribute to the observed differences in the urinary  $^{15}\text{N}$  depletion rate.  
299 Indeed, the dietary N influx into the plasma pool, while being much smaller than the  
300 endogenous AA influx by protein degradation (Lobley, 2003), had the largest  $\delta^{15}\text{N}$  difference  
301 with body AA at the beginning of the diet-switch (dietary AA were largely  $^{15}\text{N}$  depleted  
302 compared to the body AA previously  $^{15}\text{N}$  enriched during the administration of  $^{15}\text{N}$  labelled  
303 urea). In consequence, the urinary  $\delta^{15}\text{N}$  kinetics were probably mainly driven by the dietary AA  
304 influx during the very first days ( $k_1$  phase), before being mostly driven by the endogenous AA  
305 influx released from the whole-body protein degradation thereafter ( $k_2$  phase). All these three  
306 factors (rumen microbiota metabolism, isotopic labelled urea clearance rate and differences in  
307 N absorption across treatments) would have thus a limited short impact on the urinary  $^{15}\text{N}$   
308 turnover rate only during the first transient phase ( $k_1$ ). We think that the  $^{15}\text{N}$  depletion rate in  
309 urines during the second durable phase ( $k_2$ ) is mostly driven by the release rate of endogenous  
310  $^{15}\text{N}$  labeled AA from degradation of previously labeled body proteins. This progressive release  
311 of previously labeled AA will translate first into the free plasma AA pool and then into the urea-  
312 N pool resulting from their catabolism. Therefore, we assume that the urinary  $^{15}\text{N}$  depletion rate

313 during the second durable phase is mostly the consequence of the WBFDPDR, whereas the rate  
314 during the first transient phase is likely a mix from the previously evoked mechanisms together  
315 with (in some undetermined extent) the protein degradation rate of some very fast animal  
316 turning-over N pools.

317 A limitation to our interpretation could be that some N-containing compounds in urine  
318 are metabolically unrelated to protein degradation and AA oxidation. This could represent a  
319 potential issue particularly in ruminants where urinary urea-N excretion, the main urinary  
320 nitrogenous component, may origin in a high extent from rumen ammonia production (INRA,  
321 2018) and so from nitrogenous compounds unrelated to protein degradation and AA oxidation.  
322 It can be acknowledge that our modelled  $k_2$  likely integrates the outflow rate of those minor  
323 urinary nitrogenous compounds non related to AA oxidation and with an endogenous (animal)  
324 origin (e.g. creatine, creatinine, endogenous purine derivatives and 3-methylhistidine and other  
325 free AA). Such an endogenous nitrogenous compounds were likely previously labelled during  
326  $^{15}\text{N}$  urea administration likewise body proteins and progressively released from the animal body  
327 through the urines. However it should be stressed that i) its contribution to total urinary N  
328 remains relatively modest in productive animals (0.05 g N/kg BW/d; INRA, 2018) and ii) for  
329 some of these nitrogenous compounds their release rate is closely related to protein turnover  
330 rate (e.g. 3-methyl-histidine as an index of muscle protein degradation and endogenous purine  
331 derivatives from nucleic acid turnover rate).

332 For those urinary nitrogenous compounds non related to AA oxidation and with a  
333 ruminal origin (mostly purine derivatives [allantoin and uric acid], hippuric acid and rumen  
334 ammonia mostly transformed into urea) it can be argued, as previously mentioned, that it would  
335 have probably an impact on the first transient phase of the urinary  $^{15}\text{N}$  depletion rate ( $k_1$ ) but  
336 as long as the plasma absorption of such a compounds remains relatively constant across the  
337 study they will not have an effect on the second transient phase of this depletion ( $k_2$ ). Taking

338 all this together, we can consider that even if  $k_2$  does not strictly correspond only to the  
339 WBFPPDR, it may reflect quantitatively this flux and can be proposed as a proxy of it.

340 To evaluate the aforementioned biological interpretations, we tested the ability of our  
341 method to detect differences across two dietary factors, the protein content (Normal vs High)  
342 and AA profile (diets balanced vs unbalanced in methionine), known to impact the whole-body  
343 protein turnover rate in a different extent.

#### 344 *Isotopic turnover rates across dietary factors impacting protein metabolism*

345 Dietary protein content determines the dietary AA flux to the organism and is the major  
346 dietary determinant of the whole-body protein turnover rates in humans (Waterlow, 2006) and  
347 farm animals (Lobley, 2003) through the action of catabolic and anabolic hormones. In the  
348 present study, the urinary  $^{15}\text{N}$ -depletion rates during both the first transient ( $k_1$ ) and second  
349 durable ( $k_2$ ) phases increased on average around 28% when increasing the metabolizable  
350 protein content by 20%. This finding is in line with the expected increases in dietary AA influx  
351 and WBFPPDR that have been well recorded in  $k_1$  and  $k_2$ , respectively. When a similar diet-  
352 switch approach was applied on adult rats fed diets at or much above protein requirements (10  
353 vs 30 % CP), the urinary turnover rate of  $^{15}\text{N}$  increased more than two folds, in agreement with  
354 an expected higher protein turnover rate (Braun et al., 2013). Our values for the WBFPPDR  
355 (average  $k_2 = 9.1\%/d$ ) are, however, higher than those reported in the few studies using standard  
356 isotopic methods in growing ruminants, which themselves encompasses a wide range (Lobley  
357 et al., 1980 [3.88-8.00%/d whole-body protein FSR in growing heifers]; Liu et al., 1995 [6.15  
358 -7.63%/d WBFPPDR rate in growing lambs]; Wessels et al., 1997 [calculated WBFPPDR rate of  
359 around 1.8%/d] in growing steers) but still lower than other estimates (Davis et al., 1980  
360 [19.7%/d WBFPPDR rate in growing lambs]). Although the methods are not comparable (few days  
361 vs several months) and our higher values compared to other cattle studies (Wessels et al., 1997;  
362 Lobley et al., 1980) could be just the consequence of using late maturing breeds with high



363 growth rates (1.70 kg/d on average for the studied period) and retaining between 35-45% of  
364 their energy as protein (Geay and Robelin, 1979), the obtained values will need further  
365 confirmation and interpretation.

366 We also found that the plasma protein  $^{15}\text{N}$ -depletion rate (k) increased with the dietary  
367 protein content, supporting the idea of a greater protein metabolism at all body levels as  
368 revealed through the analysis of urines. Likewise, Tsahar and coworkers also found in birds  
369 that the  $^{15}\text{N}$  turnover rate in plasma doubled (from around 11 to 20 %/d) when dietary protein  
370 shifted from 7 to 16 % CP (Tsahar et al., 2008). The impact of dietary protein content on the  
371 protein turnover rate of plasma proteins was demonstrated in the 50's through the elegant study  
372 by Steinbock and Tarver (1954) who injected into rats plasma from donor rats in which the  
373 proteins were previously labelled with [ $^{35}\text{S}$ ] methionine. However this effect was not observed  
374 in ruminants through standard isotopic methods, where the plasma proteins FSR remained  
375 unchanged in dairy cows fed different dietary metabolizable protein content (Raggio et al.,  
376 2007) or sheep undergoing a shift between the fasted to fed state (Connel et al., 1997).

377 On the other hand, no changes in the rate at which urines are progressively depleted in  
378  $^{15}\text{N}$  following an isotopic diet-switch were found between unbalanced vs balanced diets in terms  
379 of methionine content. In contrast, plasma protein  $^{15}\text{N}$ -depletion rate was slightly increased,  
380 indicating that protein FSR was enhanced for plasma proteins and likely also at other different  
381 body levels. Our findings may indicate that the observed trend for AA balanced diets to improve  
382 beef cattle performances observed in this experiment (Cantalapiedra-Hijar et al., 2018) and  
383 others (Wessels et al., 1997) could stem from an increased whole-body protein synthesis rather  
384 than a reduction in the whole-body protein degradation.

385 In conclusion, we believe that the rate at which animal's urines are depleted in  $^{15}\text{N}$  after  
386 stopping the administration of  $^{15}\text{N}$  labelled urea in the diet (i.e. isotopic turnover rate after diet  
387 switch) can be proposed as a non-invasive and simple proxy to evaluate in the long term the



388 whole-body protein turnover rate in a high number of animals. Further studies are warranted to  
389 explore the potential and limits of this new promising isotopic approach for evaluating protein  
390 turnover.

#### 391 ACKNOWLEDGMENTS

392 The authors thank Vincent Largeau and the staff of Herbipôle for their great technical assistance  
393 during this experiment. INRA's Phase department is acknowledged for supporting the pilot  
394 study that served to establish the conditions of the experiment here presented. Thanks to Adisseo  
395 France S.A.S for his financial support of the study here presented.

#### 396 LITERATURE CITED

- 397 Abimorad, E. G., C. Ducatti, D. Castellani, R. K. Jomori, M. C. Portella, and D. J. Carneiro.  
398 2014. The use of stable isotopes to investigate the effects of supplemental lysine and  
399 methionine on protein turnover and amino acid utilization in pacu, *Piaractus mesopotamicus*,  
400 juveniles. *Aquaculture*, 433: 119-124.
- 401 Arneson, L. S., S. MacAvoy, and E. Basset. 2006. Metabolic protein replacement drives tissue  
402 turnover in adult mice. *Can. J. Zool.* 84: 992-1002
- 403 Bahar, B., S. M. Harrison, A. P. Moloney, F. J. Monahan, and O. Schmidt. 2014. Isotopic  
404 turnover of carbon and nitrogen in bovine blood fractions and inner organs. *Rapid Commun.*  
405 *Mass Spectrom.* 28:1011-1018.
- 406 Braun, A., K. Auerswald, A. Vikari, and H. Schnyder. 2013. Dietary protein content affects  
407 isotopic carbon and nitrogen turnover. *Rapid Commun. Mass Spectrom.* 27: 2676-2684.
- 408 Cantalapiedra-Hijar, G., I. Ortigues-Marty, B. Sepchat, J. Agabriel, J. F. Huneau, and H.  
409 Fouillet. 2015. Diet-animal fractionation of nitrogen stable isotopes reflects the efficiency  
410 of nitrogen assimilation in ruminants. *Br. J. Nutr.* 113: 1158-1169.

- 411 Cantalapiedra-Hijar, G., L. Bahloul, C. Chantelauze, V. Largeau, N. Khodorova, H. Fouillet,  
412 and I. Ortigues-Marty. 2018. Improved cattle performance by methionine-balanced diets  
413 does not results from decreased protein degradation. Proc. Eur. Assoc. Anim. Prod. (in press)
- 414 Carleton, S. A., and C. Martinez del Rio. 2005. The effect of cold-induced increased metabolic  
415 rate on the rate of <sup>13</sup>C and <sup>15</sup>N incorporation in house sparrows (*Passer*  
416 *domesticus*). *Oecologia*, 144: 226-232.
- 417 Carleton, S. A., Kelly, L., Anderson-Sprecher, R., and C. Martinez del Rio. 2008. Should we  
418 use one-, or multi-compartment models to describe <sup>13</sup>C incorporation into animal  
419 tissues?. *Rapid Commun. Mass Spectrom.* 22: 3008-3014.
- 420 Castro Bulle, F. C. P., P. V. Paulino, A. C. Sanches, and R. D. Sainz. 2007. Growth, carcass  
421 quality, and protein and energy metabolism in beef cattle with different growth potentials  
422 and residual feed intakes. *J. Anim. Sci.* 85: 928-936.
- 423 Caton, J. S., M. L. Bauer, and H. Hidari. 2000. Metabolic components of energy expenditure in  
424 growing beef cattle-review. *Asian-Australas. J. Anim. Sci.* 13: 702-710.
- 425 Cerling, T. E., L. K. Ayliffe, M. D. Dearing, J. R. Ehleringer, B. H. Passey, D. W. Podlesak,  
426 A.M. Torregrossa, and A. G. West. 2007. Determining biological tissue turnover using stable  
427 isotopes: the reaction progress variable. *Oecologia*, 151: 175-189.
- 428 Connell, A., A. G. Calder, S. E. Anderson, and G. E. Lobley. 1997. Hepatic protein synthesis  
429 in the sheep: effect of intake as by use of stable-isotope-labelled glycine, leucine and  
430 phenylalanine. *Br. J. Nutr.* 77: 255-271.
- 431 Davis, S. R., T. N. Barry, and G. A. Hughson. 1981. Protein synthesis in tissues of growing  
432 lambs. *Br. J. Nutr.* 46: 409-419.
- 433 Fry, B., and C. Arnold. 1982. Rapid <sup>13</sup>C/<sup>12</sup>C turnover during growth of brown shrimp  
434 (*Penaeus aztecus*). *Oecologia*, 54: 200-204.

- 435 Geay, Y., and J. Robelin. 1979. Variation of meat production capacity in cattle due to genotype  
436 and level of feeding: genotype-nutrition interaction. *Liv. Prod. Sci.* 6: 263-276.
- 437 Harrison, S. M., O. Schmidt, A. P. Moloney, S. D. Kelly, A. Rossmann, A. Schellenberg, F.  
438 Camin, M. Perini, J. Hoogewerff, and F. J. Monahan. 2011. Tissue turnover in ovine muscles  
439 and lipids as recorded by multiple (H, C, O, S) stable isotope ratios. *Food Chem.* 124: 291-  
440 297.
- 441 INRA, 2018. INRA feeding system for ruminants. Wageningen Academic Publishers,  
442 Wageningen, the Netherlands, 640 pp.
- 443 Liu, S. M., G. E. Lobley, N. A. MacLeod, D. J. Kyle, X. B. Chen, and E. R. Ørskov. 1995.  
444 Effects of long-term protein excess or deficiency on whole-body protein turnover in sheep  
445 nourished by intragastric infusion of nutrients. *Br. J. Nutr.* 73: 829-839.
- 446 Lobley, G. E., V. Milne, J. M. Lovie, P. J. Reeds, and K. Pennie. 1980. Whole body and tissue  
447 protein synthesis in cattle. *Br. J. Nutr.* 43: 491-502.
- 448 Lobley, G. E. 2003. Protein turnover—what does it mean for animal production?. *Can. J. Anim.*  
449 *Sci.* 83: 327-340.
- 450 MacAvoy, S. E., S. A. Macko, and L. S. Arneson. 2005. Growth versus metabolic tissue  
451 replacement in mouse tissues determined by stable carbon and nitrogen isotope  
452 analysis. *Can. J. Zool.* 83: 631-641.
- 453 Martinez del Rio, C. M. D., and S. A. Carleton. 2012. How fast and how faithful: the dynamics  
454 of isotopic incorporation into animal tissues. *J. Mammal.* 93: 353-359.
- 455 Martinez del Rio, C. M. D., and Anderson-Sprecher, R. 2008. Beyond the reaction progress  
456 variable: the meaning and significance of isotopic incorporation data. *Oecologia*, 156: 765-  
457 772.
- 458 Mohan, J. A., S. D. Smith, T. L. Connelly, E. T. Attwood, J. W. McClelland, S. Z. Herzka, and  
459 B. D. Walther. 2016. Tissue-specific isotope turnover and discrimination factors are affected

- 460 by diet quality and lipid content in an omnivorous consumer. *J. Exp. Mar. Biol. Ecol.* 479:  
461 35-45.
- 462 Nishizawa, N., Y. Toyoda, T. Noguchi, S. Hareyama, H. Itabashi, and R. Funabiki. 1979. N  $\tau$ -  
463 Methylhistidine content of organs and tissues of cattle and an attempt to estimate fractional  
464 catabolic and synthetic rates of myofibrillar proteins of skeletal muscle during growth by  
465 measuring urinary output of N  $\tau$ -methylhistidine. *Br. J. Nutr.* 42: 247-252.
- 466 Pinheiro, J. C., and D. M. Bates. 2000. Linear mixed-effects models. In *Mixed-effects models*  
467 *in S and S-Plus* (ed. J. Chambers, W. Eddy, Hardle, S. Sheather, L. Tierney), pp. 3-56.  
468 Springer, New York, USA.
- 469 Poupin, N., J. F. Huneau, F. Mariotti, D. Tomé, C. Bos, and H. Fouillet, H. 2012. Isotopic and  
470 modeling investigation of long-term protein turnover in rat tissues. *Amer. J. Physiol. Regul.*  
471 *Integr. Comp. Physiol.* 304: R218-R231.
- 472 Raggio, G., G. E. Lobley, R. Berthiaume, D. Pellerin, G. Allard, P. Dubreuil, and H. Lapierre.  
473 2007. Effect of protein supply on hepatic synthesis of plasma and constitutive proteins in  
474 lactating dairy cows. *J. Dairy Sci.* 90: 352-359.
- 475 Steinbock, H. L., and H. Tarver. 1954. Plasma protein. 5. The effect of the protein content of  
476 the diet on turnover. *J. Biol. Chem.* 209: 127-132.
- 477 Tieszen, L. L., T. W. Boutton, K. G., Tesdahl, and N. A. Slade. 1983. Fractionation and turnover  
478 of stable carbon isotopes in animal tissues: implications for  $\delta^{13}\text{C}$  analysis of  
479 diet. *Oecologia* 57: 32-37.
- 480 Tsahar, E., N. Wolf, I. Izhaki, Z. Arad, and C. Martinez del Rio. 2008. Dietary protein  
481 influences the rate of  $^{15}\text{N}$  incorporation in blood cells and plasma of Yellow-vented bulbuls  
482 (*Pycnonotus xanthopygos*). *J. Exp. Biol.* 211: 459-465.
- 483 Wallace, R. J., and C. A. McPherson. 1987. Factors affecting the rate of breakdown of bacterial  
484 protein in rumen fluid. *Br. J. Nutr.* 58: 313-323.

- 485 Wessels, R. H., E. C. Titgemeyer, and G. St Jean. 1997. Effect of amino acid supplementation  
486 on whole-body protein turnover in Holstein steers. *J. Anim. Sci.* 75: 3066-3073.
- 487 Waterlow, J. C. 1984. Protein turnover with special reference to man. *Exp. Physiol.* 69: 409-  
488 438.
- 489 Waterlow, J. C. 2006. Protein turnover. CAB International, Nosworthy Wag Wallingford,  
490 Oxfordshire OX10 8DE, UK.



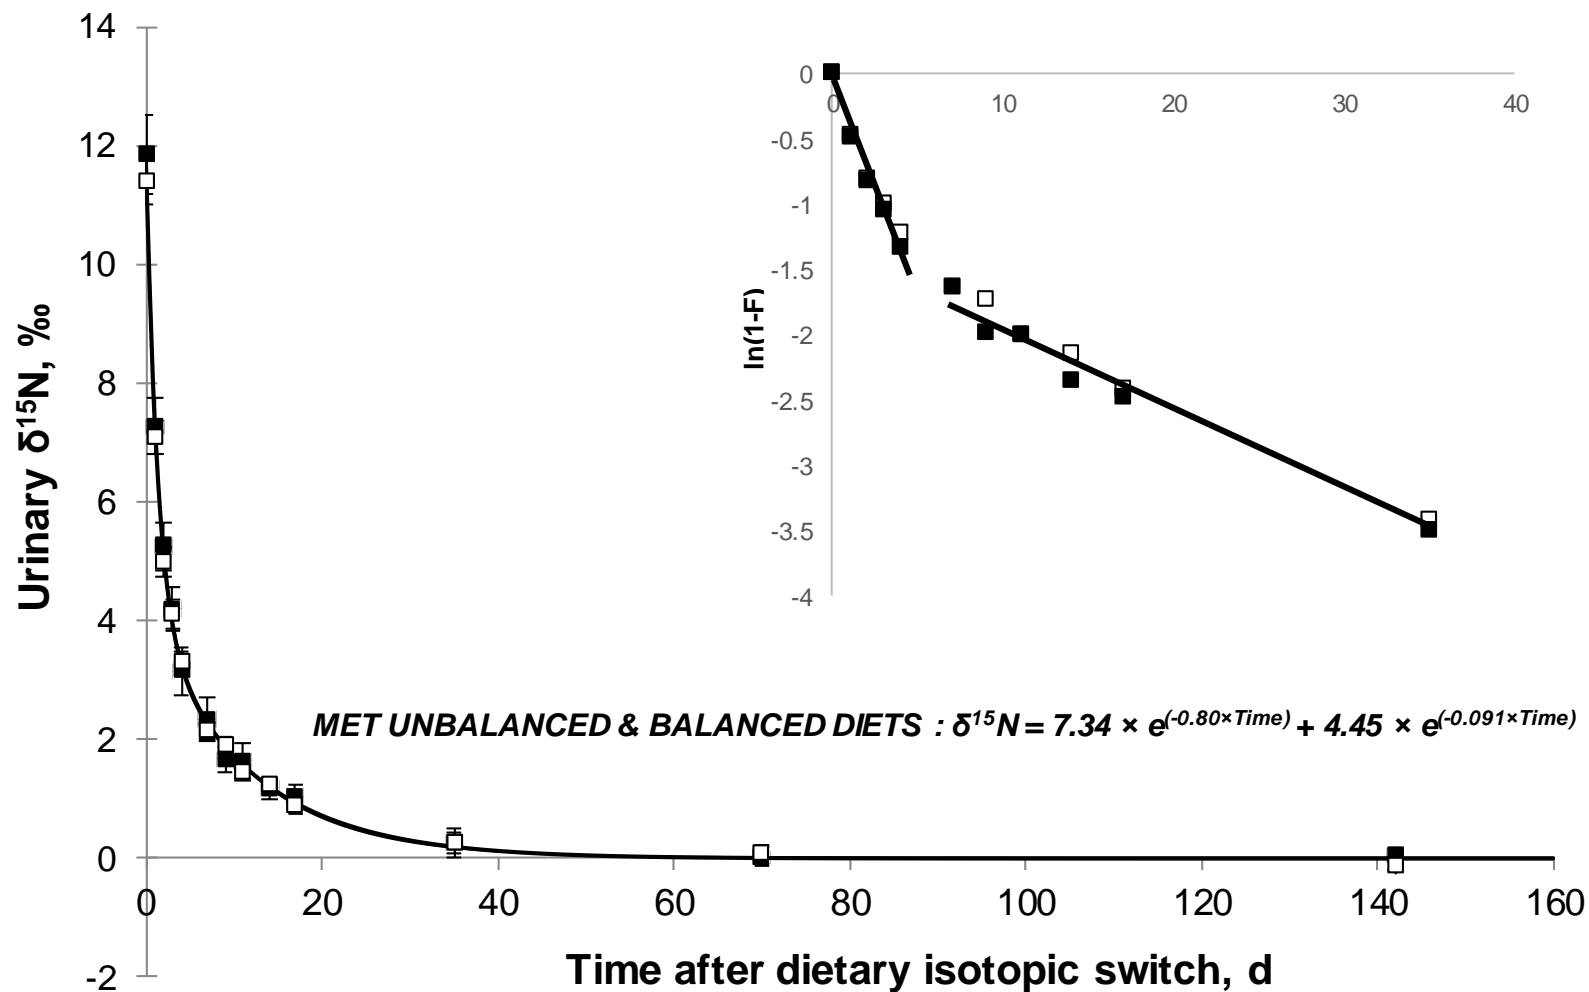

**Figure 2.** Kinetics of  $^{15}\text{N}$ -depletion in urines after a  $^{15}\text{N}$  diet-switch (see Material and Methods) in Charolais fattening bulls fed either balanced (thin line) or unbalanced (thick line) diets in terms of methionine content. Compared to animals fed diets unbalanced in methionine ( $n = 17$ ), animals fed diets balanced in methionine ( $n = 17$ ) showed similar fractional rates of urinary  $^{15}\text{N}$ -depletion during both the first rapid (80.0%/d;  $P = 0.92$ ) and the second slow (9.10%/d;  $P = 0.80$ ) phases. Inset represents the reaction-progress variable approach [ $\ln(1-F)$ ; see Material and Methods] diagnosing that adequately fitting the  $^{15}\text{N}$  depletion kinetics in urine required a bi-exponential model with two rates for two - rapid and slow - phases (Martinez del Rio and Carleton, 2012).

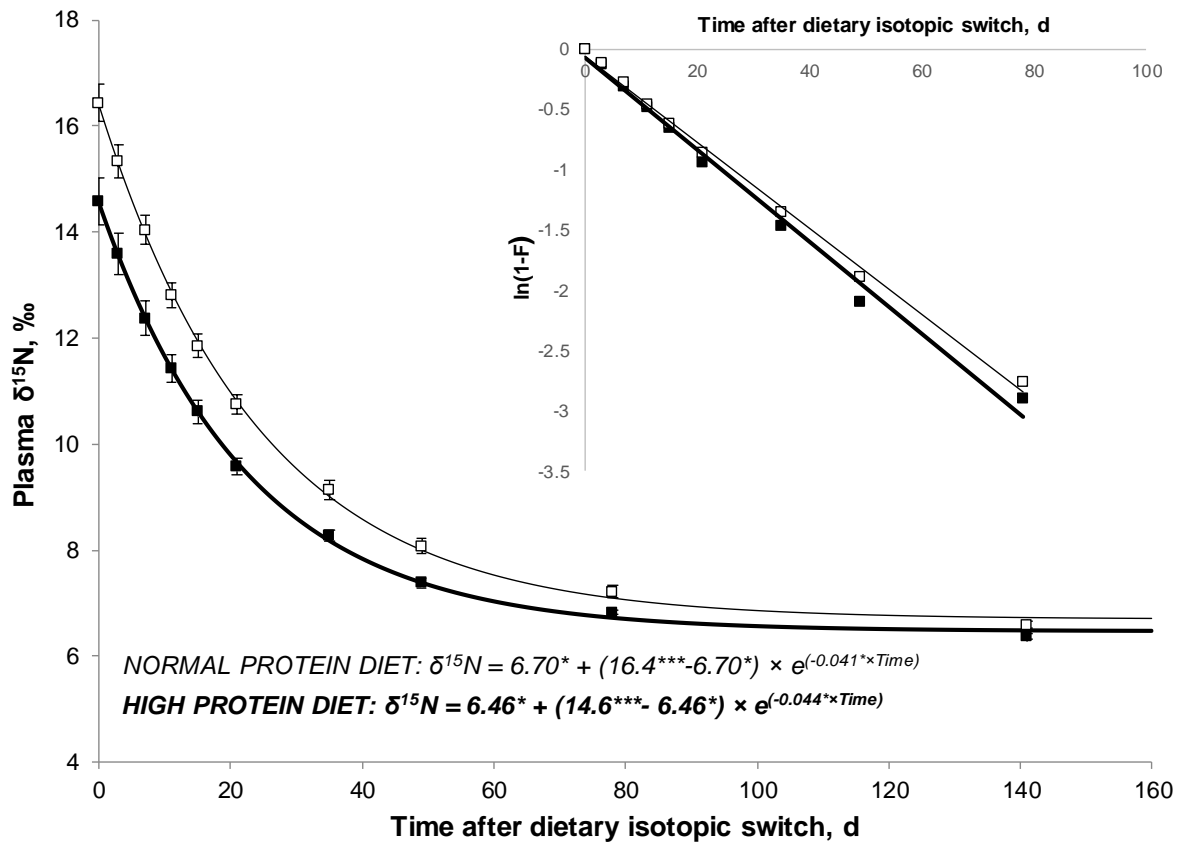

**Figure 3.** Kinetics of  $^{15}\text{N}$  depletion in plasma proteins after a  $^{15}\text{N}$  diet switch (see Material and Methods) in Charolais fattening bulls fed either Normal or High protein diets. Compared to animals fed Normal protein diets ( $n = 18$ ), animals fed High protein diets ( $n = 18$ ) showed lower plasma protein  $\delta^{15}\text{N}$  values at time 0 (14.6 vs. 16.4‰;  $P < 0.001$ ) and higher fractional rate of plasma protein  $^{15}\text{N}$ -depletion (4.42 vs. 4.08 %/d;  $P = 0.02$ ). Inset represents the reaction-progress variable approach [ $\ln(1-F)$ ; see Material and Methods] diagnosing that a mono-exponential model was sufficient to adequately fit the  $^{15}\text{N}$ -depletion kinetics in plasma proteins (Martinez del Rio and Carleton, 2012). Significant differences in model parameters across treatments are depicted by stars ( $***P < 0.001$ ;  $**P < 0.01$ ;  $*P < 0.05$ ).



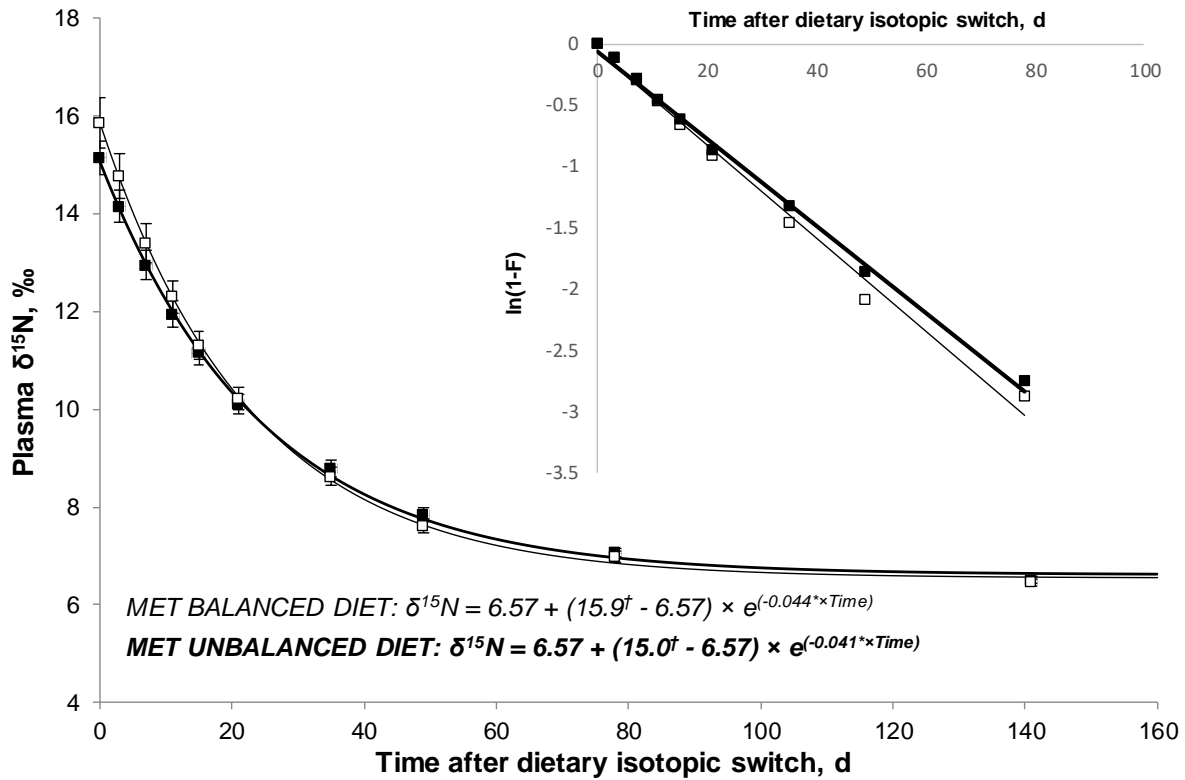

**Figure 4.** Kinetics of  $^{15}\text{N}$  depletion in plasma proteins after a  $^{15}\text{N}$  diet switch (see Material and Methods) in Charolais fattening bulls fed either balanced or unbalanced diets in terms of methionine content. Compared to animals fed diets unbalanced in methionine ( $n = 18$ ), animals fed diets balanced in methionine ( $n = 18$ ) showed higher plasma protein  $\delta^{15}\text{N}$  values at time 0 (15.9 vs. 15.0‰;  $P = 0.05$ ) and higher fractional rate of plasma protein  $^{15}\text{N}$ -depletion (4.38 vs. 4.10%/d;  $P = 0.05$ ). Inset represents the reaction-progress variable approach [ $\ln(1-F)$ ; see Material and Methods] diagnosing that a mono-exponential model was sufficient to adequately fit the  $^{15}\text{N}$  depletion kinetics in plasma proteins (Martinez del Rio and Carleton, 2012). Significant differences in model parameters across treatments are depicted by symbols ( $^{\dagger}P < 0.10$ ;  $^*P < 0.05$ ).

**APPENDIX (Figure A1):** Modelling the kinetics of  $^{15}\text{N}$  depletion after a  $^{15}\text{N}$  diet-switch in ruminants depending on whether a mono-exponential model is sufficient or a bi-exponential model is required to adequately fit the data A) Mono-exponential model (like in plasma proteins) where  $\delta^{15}\text{N}$  kinetics are adequately fitted according to  $\delta^{15}\text{N}(t) = \delta^{15}\text{N}_\infty + (\delta^{15}\text{N}_0 - \delta^{15}\text{N}_\infty) \times e^{-k \times t}$  and a single slope is noted when the logarithm of the reaction progress variable ( $1-F = (\delta^{15}\text{N}(t) - \delta^{15}\text{N}_\infty) / (\delta^{15}\text{N}_0 - \delta^{15}\text{N}_\infty)$ ) is regressed on time. B) Bi-exponential model (like in urines) where  $\delta^{15}\text{N}$  kinetics are adequately fitted according to  $\delta^{15}\text{N}(t) = \delta^{15}\text{N}_\infty + (\delta^{15}\text{N}_0 - \delta^{15}\text{N}_\infty) \times [p \times e^{-k_1 \times t} + (1-p) \times e^{-k_2 \times t}]$  and two different slopes are noted when the logarithm of the reaction progress variables is regressed on time. The two different slopes represent the fractional turnover rates during a first transient ( $k_1$ ) and a second durable ( $k_2$ ) phases, respectively.

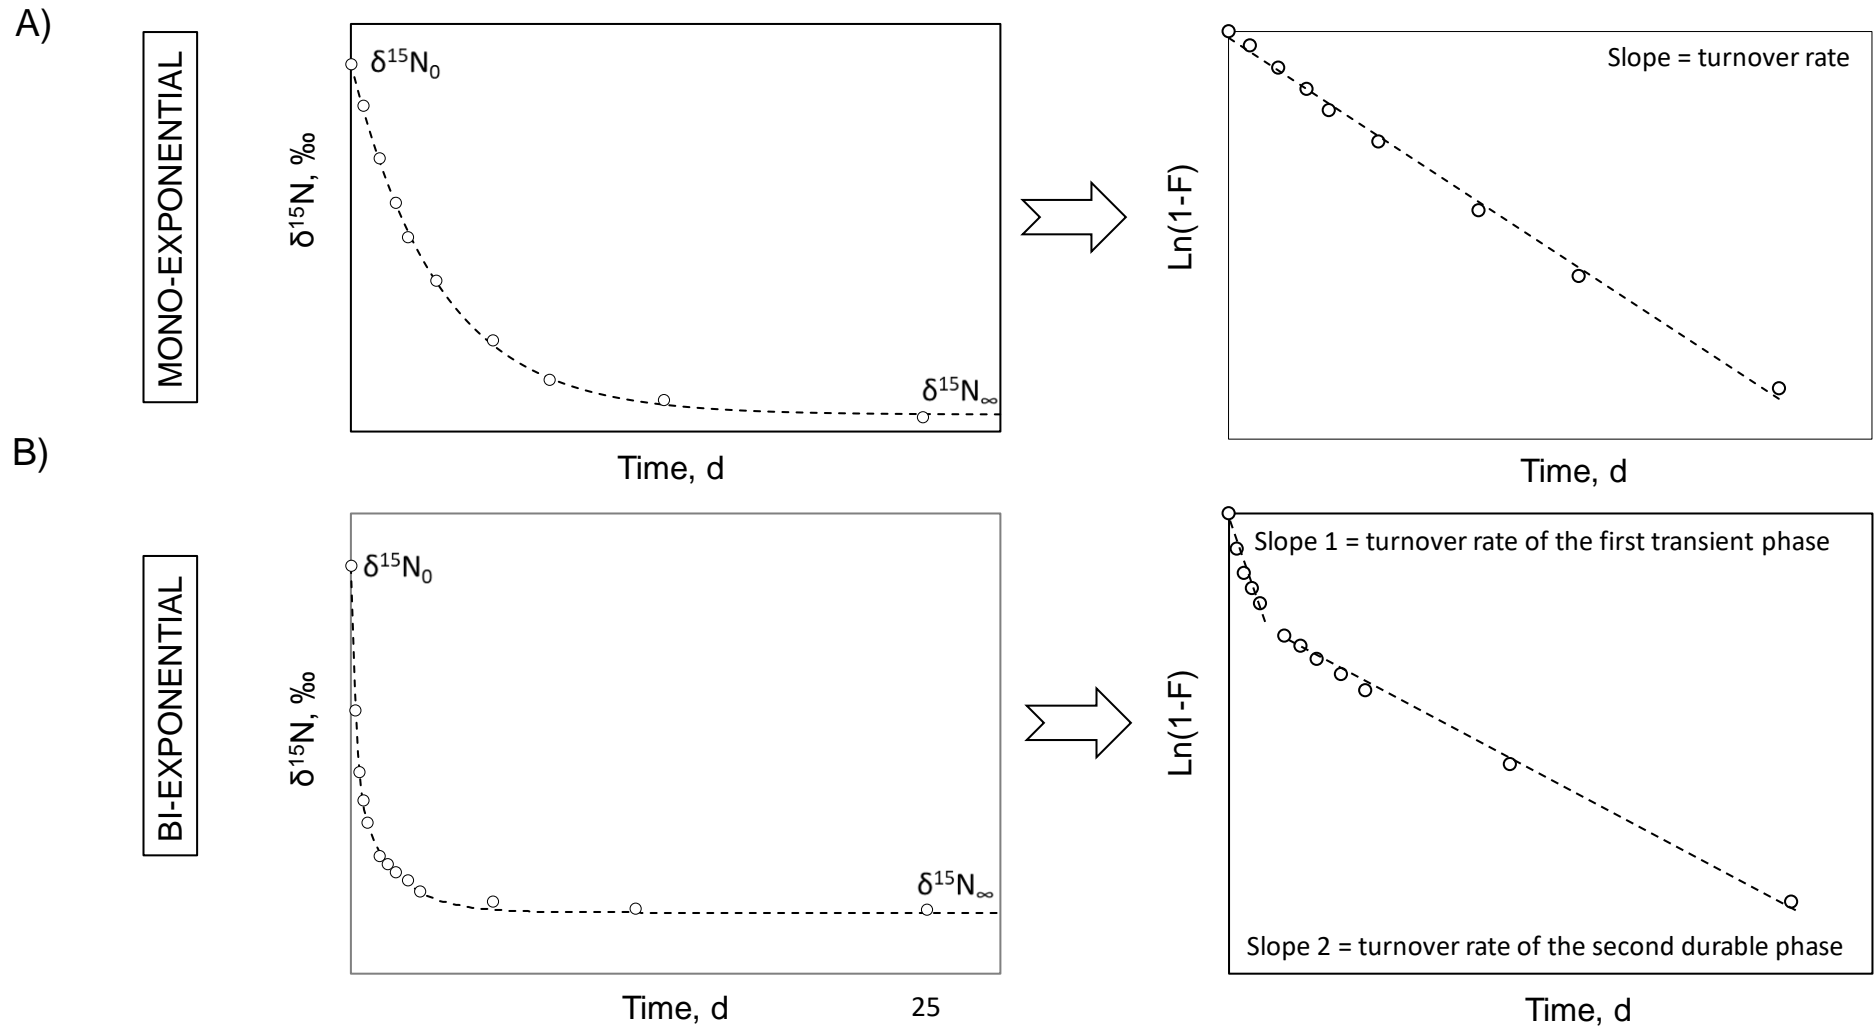

Source: https://www.biorxiv.org/content/10.1101/543116v1.full.pdf
